# Supplementary material
Source: PubMed Central journal article supplement (PMC7864872)
Supplement: NIHMS1657190-supplement-318239_Major_Resources_Table.pdf [file NIHMS1657190-supplement-318239_Major_Resources_Table.pdf]

## Major Resources Table

### Animals (in vivo studies)

| Species | Vendor or Source           | Background Strain  | Sex  | Persistent ID / URL |
|---------|----------------------------|--------------------|------|---------------------|
| Mice    | Charles River Laboratories | C57BL/6N strain 02 | both |                     |

### Antibodies

| Target antigen                              | Vendor or Source | Catalog #  | Working concentration           | Lot # (preferred but not required) | Persistent ID / URL |
|---------------------------------------------|------------------|------------|---------------------------------|------------------------------------|---------------------|
| Mitotracker Deep Red FM                     | Invitrogen       | #M22426    | 1 $\mu$ mol/L                   |                                    |                     |
| Polyclonal rabbit NCLX                      | Biorbyt          | #orb317904 | 1:50                            | Lot: BS9098                        |                     |
| rabbit polyclonal NaV1.5                    | Sigma            | #S0819     | 1:50                            |                                    |                     |
| mouse monoclonal $\alpha$ -actinin          | Sigma            | #A7811     | 1:200                           |                                    |                     |
| Alexa Fluor 568 goat anti-rabbit            | Invitrogen       | #A11011    | 1:300 Confocal/<br>1:10000 SRes | Lot: 1778925                       |                     |
| APEX™ Alexa Fluor 568 Antibody Labeling Kit | Invitrogen       | #A10494    |                                 |                                    |                     |
| Alexa Fluor goat anti-rabbit 488            | Invitrogen       | #A11008    | 1:10000                         | Lot: 2179202                       |                     |
| ProLong Gold antifade reagent               | Invitrogen       | P36930     |                                 | Lot: 2204416                       |                     |

### Cultured Cells

| Name            | Vendor or Source                             | Sex (F, M, or unknown) | Persistent ID / URL |
|-----------------|----------------------------------------------|------------------------|---------------------|
| HL-1 cells      | Claycomb lab                                 | N/A                    |                     |
| hiPSC line 19c3 | derived from a healthy male (Burridge's lab) |                        |                     |

### Data & Code Availability

| Description       | Source / Repository                                                                                     | Persistent ID / URL |
|-------------------|---------------------------------------------------------------------------------------------------------|---------------------|
| cluster analysis  | <a href="https://github.com/FenyoLab/Cluster_Analysis">https://github.com/FenyoLab/Cluster_Analysis</a> |                     |
| Randomized images | <a href="https://github.com/FenyoLab/IFSimPy">https://github.com/FenyoLab/IFSimPy</a>                   |                     |

### Other

| Description         | Source / Repository            | Persistent ID / URL |
|---------------------|--------------------------------|---------------------|
| collagenase type II | Worthington, Lakewood, NJ, USA |                     |
| Rhod-2 AM           | Thermo Fisher                  |                     |
| TTX                 | Tocris                         |                     |
| FCCP                | Tocris                         |                     |
| Oligomycin A        | Sigma                          |                     |
| CGP-37157           | Tocris                         |                     |

DOI [to be added]

|                                                            |                    |  |
|------------------------------------------------------------|--------------------|--|
| MitoSOX Red                                                | Invitrogen         |  |
| RPMI 1640                                                  | Corning, 10-040-CM |  |
| glycogen synthase kinase 3- $\beta$ inhibitor<br>CHIR99021 | LC Labs, C-6556    |  |
| RBA-C59                                                    | GenDEPOT, A0100    |  |
| Wnt-C59                                                    | Biorbyt, orb181132 |  |
